# Supplementary material
Source: Springer Nature journal article supplement (https://www.springermedizin.de/resource/supplementary/12993_2011_341_MOESM1_ESM.pdf/9617566)

## Phase 2 (Training)

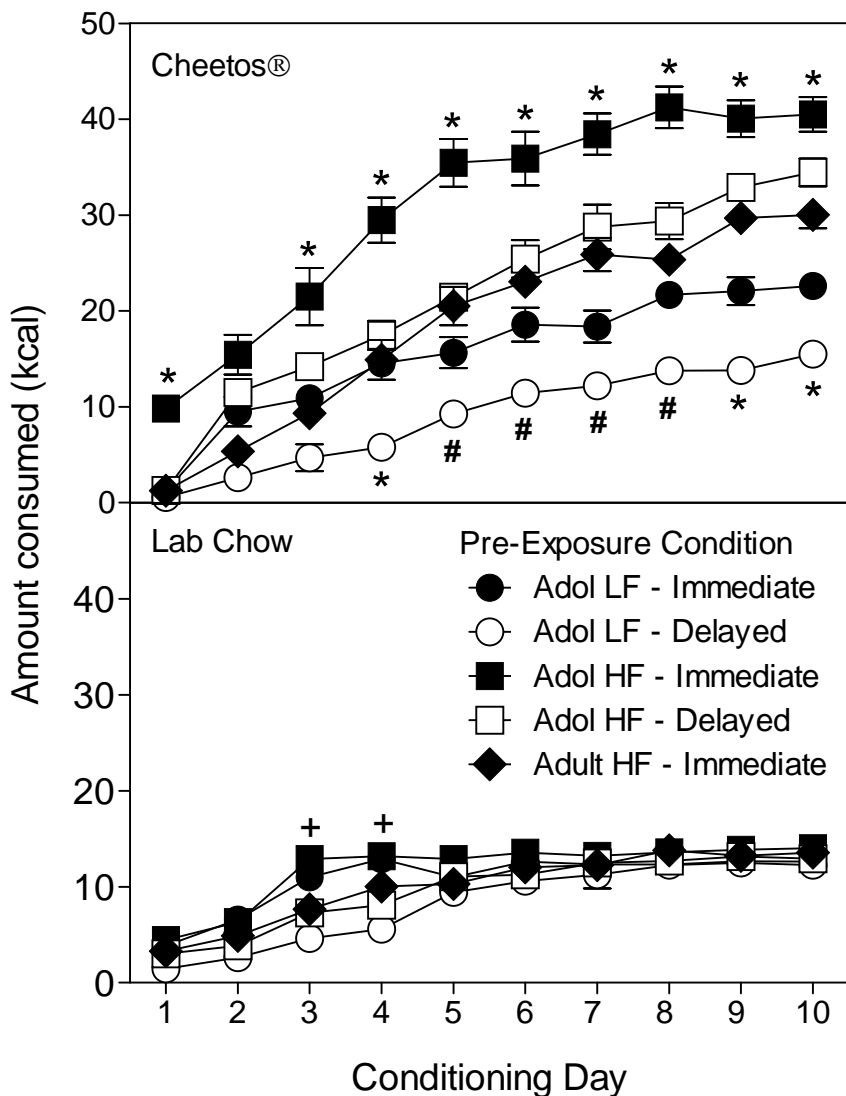

Supplement: MOESM1 [file 9617566]
